# Supplementary material
Source: PubMed Central journal article supplement (PMC2944910)
Supplement: NIHMS208006-supplement-1.pdf [file NIHMS208006-supplement-1.pdf]

995 extensions (amino acid residues XX-YY in ZZZ) were removed. The trimmed  
996 alignment was used for the generation of an unrooted tree by the neighbor-  
997 joining method with 500 bootstrap replicates using MEGA4.1 package (Tamura  
998 *et al.*, 2007). The ABC transporters of *D. melanogaster* and *An. gambiae* are  
999 indicated with NP and XP prefix accession numbers, respectively. Seven ABC  
1000 transporter subfamilies are indicated on the right of tree. Nodes with >50%  
1001 bootstrap support were only marked with percentage values.

1002

1003

1004 **Supplementary Figure 1.** Phylogenetic relationships of three *P. h. humanus*  
1005 neuronal component protein families, including (A) voltage-dependent sodium  
1006 channel  $\alpha$ -subunit (VDSC), (B) sodium channel auxiliary subunit and (C) nicotinic  
1007 acetylcholine receptor subunit (nAChR), with respective homologues from *D.*  
1008 *melanogaster* (Dm). Deduced amino acid sequences were aligned using  
1009 ClustalW (Thompson *et al.*, 1994), and rooted trees were generated from the  
1010 alignments by the neighbor-joining method with 500 bootstrap replicates using  
1011 MEGA4.1 package (Tamura *et al.*, 2007). The *D. melanogaster* voltage-  
1012 dependent calcium channel (Dm VDCC, CG4894-PA), *Homo sapiens* calcium-  
1013 activated potassium channel beta 2 subunit (Hs KCNMB2, NP\_005828), and *D.*  
1014 *melanogaster* *Rdl* GABA receptor subunit (CG10537-PA) were used as  
1015 outgroups for the tree generation of VDSC, sodium channel auxiliary subunit, and  
1016 nAChR, respectively. Nodes with >50% bootstrap support were only marked with  
1017 percentage values.

1018

1019 **Supplementary Figure 2.** Transcription factor binding motifs observed in  
1020 cytochrome P450s of *P. h. humans*. The sequences include 800 base pairs  
1021 upstream of all P450 genes' transcription start sites, and 200 base pairs after the  
1022 transcription start sites.

1023

1024 **Supplementary Figure 3.** Transcription factor binding motifs observed in GSTs  
1025 of *P. h. humans*. The sequences include 800 base pairs upstream of the genes'  
1026 transcription start site, and 200 base pairs after the transcription start site.

1027

1028 **Supplementary Figure 4.** Transcription factor binding motifs observed in  
1029 Esterases of *P. h. humans*. The sequences include 800 base pairs upstream of  
1030 the gene's transcription start site, and 200 base pairs after the transcription start  
1031 site.
