# Supplementary material
Source: PubMed Central journal article supplement (PMC2944910)

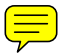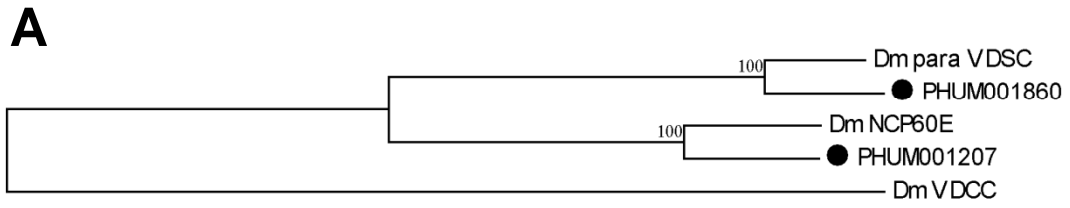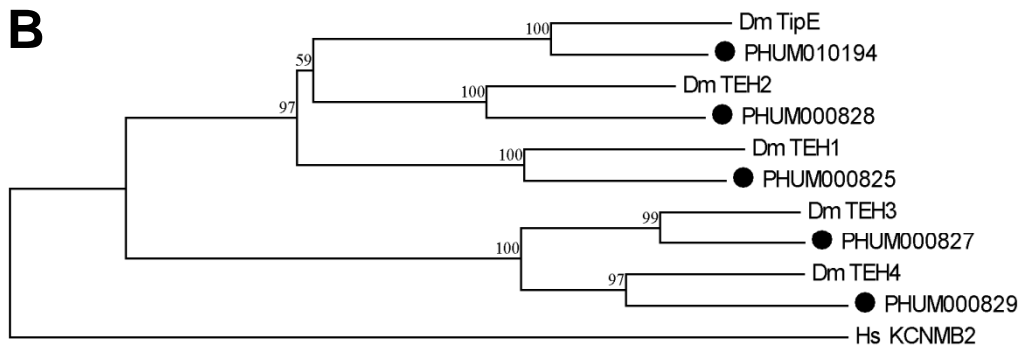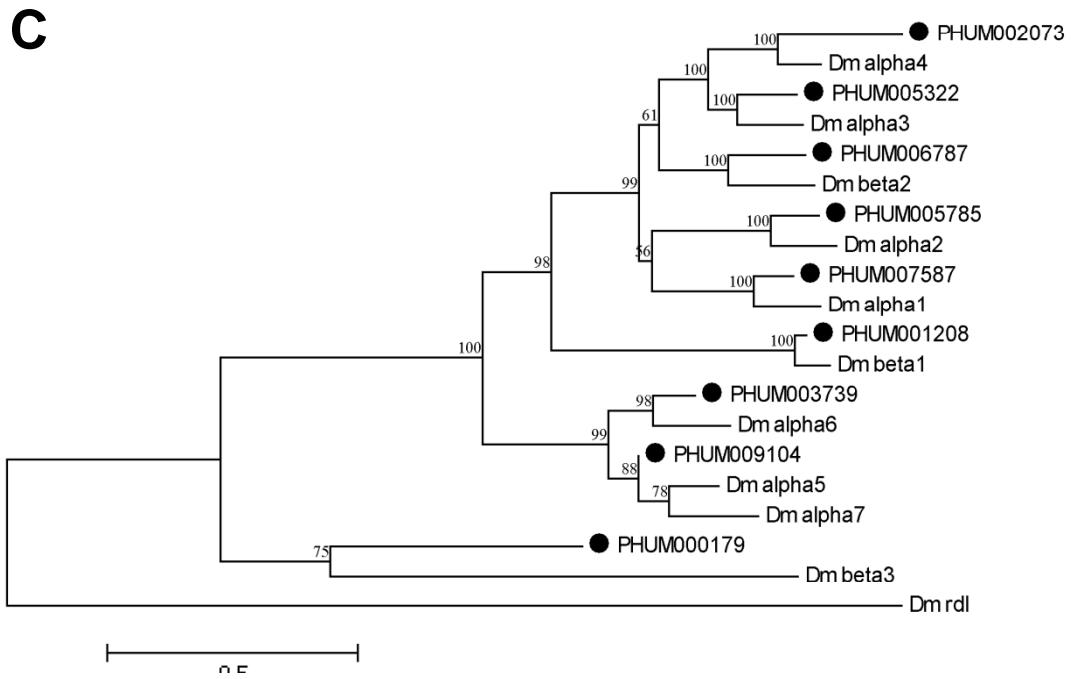

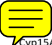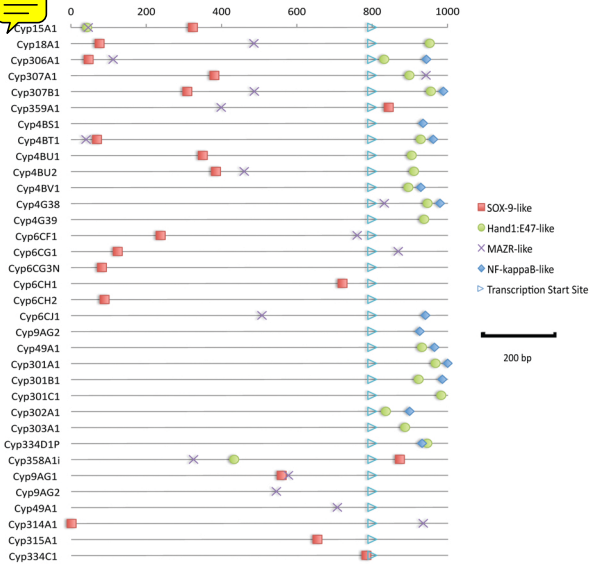

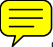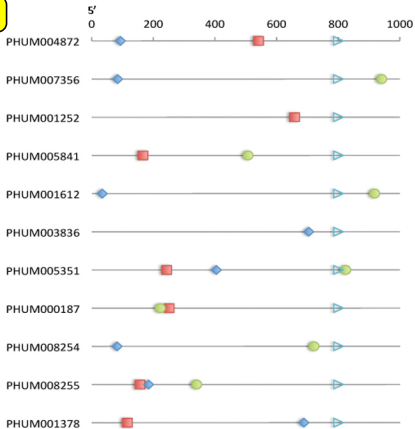

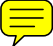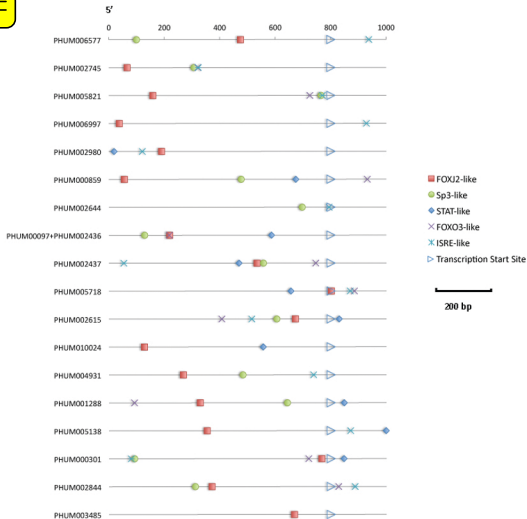

Supplement: NIHMS208006-supplement-Supp_Fig_s1-s4.pdf [file NIHMS208006-supplement-Supp_Fig_s1-s4.pdf]
